# Supplementary material for: Genome-Wide Distribution of Nascent Transcripts in Sperm DNA, Products of a Late Wave of General Transcription
Source: MDPI journal article supplement (doi:10.3390/cells8101196), 2019-10-03
Supplement: s1 [file s1]

**Table S1.** Samples Concentration based on A260 measurements before and after RNase H treatment.

| Unique sample ID | Sample material  | Concentration based on A260 measurement (ng/μl) | Concentration based on A260 measurement (ng/μl) after RNase H treatment | Volume (μl) |
|------------------|------------------|-------------------------------------------------|-------------------------------------------------------------------------|-------------|
| D1               | Mouse Sperm RNA  | 9                                               | 0,001                                                                   | 100         |
| D3               | Mouse Sperm RNA  | 6                                               | 0,003                                                                   | 100         |
| R1               | Mouse Sperm RNA  | 135                                             | 129                                                                     | 100         |
| R3               | Mouse Sperm RNA  | 50                                              | 45                                                                      | 100         |
| TD1              | Mouse Testes RNA | 9                                               | 0,005                                                                   | 100         |
| TD3              | Mouse Testes RNA | 15                                              | 0,008                                                                   | 100         |

**Table S2.** Summary of read number.

| Mapping summary    | D1_L001    | D1_L002    | D3_L001    | D3_L002    | R1_L001    | R1_L002    | R3_L001    | R3_L002    |
|--------------------|------------|------------|------------|------------|------------|------------|------------|------------|
| Total reads        | 65,078,856 | 66,068,400 | 69,034,894 | 69,244,670 | 77,403,740 | 77,660,202 | 87,436,634 | 87,820,444 |
| Total mapped reads | 54,043,408 | 54,205,377 | 54,186,775 | 54,335,469 | 59,302,998 | 59,513,909 | 43,560,556 | 43,724,836 |
| Map Rate           | 83.0%      | 82.0%      | 78.5%      | 78.5%      | 76.6%      | 76.6%      | 49.8%      | 49.8%      |

**Table S3.** Primer sequences used for qPCR and relative levels of expression of ten transcripts in mature sperm of *Mus musculus*

| Name   | Primers Sequence (5'-3')        | Size (bp) |
|--------|---------------------------------|-----------|
| Fezf2  | Forward: CTGCTCACCCCAAGCTTTTCTG | 152       |
|        | Reverse: GTTCAGCTGTCAAGGCCGAG   | 152       |
| Hmx3   | Forward: GGAATCCCCGTTCTCCATCAGG | 89        |
|        | Reverse: GCAAAGAGCGTTCGTGGGG    | 89        |
| Hoxb13 | Forward: GATCTGCCAGGCTCTGCAG    | 149       |
|        | Reverse: GGCACAGGGTTTCAGGGAG    | 149       |
| Sox21  | Forward: GCTTCTGGAGTGCTCCGG     | 165       |
|        | Reverse: GCGGGCTGAGGTTTTGAG     | 165       |

|          |                                 |     |
|----------|---------------------------------|-----|
| Nanog    | Forward: GCGGTGGCAGAAAAACCAAGTG | 157 |
|          | Reverse: GGTTGGTCCAAGTCTGGCTG   | 157 |
| UPH      | Forward: GGGCATCTGTGGAAAGCAG    | 165 |
|          | Reverse: CCGAGGCCCGCTAACTTAC    | 165 |
| Lncenc1  | Forward: GCAAGGAGTTGACACGATAG   | 105 |
|          | Reverse: CTATGCAGTCTCTGTGCGC    | 105 |
| Otx-2os1 | Forward: GCACATAGGAGGAGAAAGAG   | 127 |
|          | Reverse: CTTGCCTGCTACCAACTGC    | 127 |
| Platr30  | Forward: GGATGCTCGAGATGGTCGG    | 103 |
|          | Reverse: CAGTGTGTGTCGAGCATCC    | 103 |
| Vmn1r51  | Forward: GAGTAAGTGCCCTGAGTAAG   | 141 |
|          | Reverse: CCCTGTGCTGAGGACCTTC    | 141 |

**Table S4-** The highest scores related transcription factors

|         |                                                                                                                                                                                                                                                                                            |
|---------|--------------------------------------------------------------------------------------------------------------------------------------------------------------------------------------------------------------------------------------------------------------------------------------------|
| BSX     | (Brain-specific homeobox protein homolog), DNA-binding protein acts as transcriptional activator responsible of normal postnatal growth and nursing                                                                                                                                        |
| Gsc2    | (Homeobox protein goosecoid-2), probably involved in development and autoregulation of transcription                                                                                                                                                                                       |
| Neurod2 | (Neurogenic differentiation factor 2), has a role in the cerebellar and hippocampal granular neurons development                                                                                                                                                                           |
| Drgx    | (Dorsal root ganglia homeobox protein), essential transcription factor forms correct neuron projections                                                                                                                                                                                    |
| Lhx5    | (LIM/homeobox protein Lhx5), plays an important role in the neuronal differentiation regulation and migration during development of the central nervous system                                                                                                                             |
| Barhl2  | (BarH-like 2 homeobox protein), regulates neural basic helix-loop-helix genes                                                                                                                                                                                                              |
| Pou6f2  | (POU domain, class 6, transcription factor 2), transcription factor probably involved in early differentiation of amacrine and ganglion cells                                                                                                                                              |
| Fezf1   | (Fez family zinc finger protein 1), transcription repressor important for the axonal projection and proper termination of olfactory sensory neurons (OSN). Plays a role in rostro-caudal patterning of the diencephalon and in prethalamus formation. Regulates olfactory bulb development |

**Table S5-** Details of the known function confirmed transcripts

| Transcript     | Function                                                                                                                                                                                                            |
|----------------|---------------------------------------------------------------------------------------------------------------------------------------------------------------------------------------------------------------------|
| <i>Hoxb13</i>  | Encodes homeobox protein Hox-B13 transcription factor, which is part of developmental regulatory system. Specifically generates cells on the anterior-posterior axis [20]                                           |
| <i>Hmx3</i>    | Homeobox protein HMX3 transcription factor. Specifies neuronal cell types that play an important role in inner ear, hypothalamus and hypothalamic/pituitary axis development [20]                                   |
| <i>Fezf2</i>   | Fez family zinc finger protein 2, which is responsible for forebrain embryonic development                                                                                                                          |
| <i>Sox21</i>   | Plays a role in progressing neurogenesis                                                                                                                                                                            |
| <i>Otx2os1</i> | Antisense strands of otx2, which in mice are involved in the development of the midbrain, forebrain and sense organs                                                                                                |
| <i>Lncenc1</i> | lncRNA that is differentially highly expressed in embryonic stem cells. Probably plays an important role in regeneration of mouse embryonic stem cells. Its depletion is associated with a significant reduction in |

|                  |                                                                                                                                                                       |
|------------------|-----------------------------------------------------------------------------------------------------------------------------------------------------------------------|
|                  | Oct4 and/or Nanog mRNA levels, and it is involved in maintaining the naïve state of embryonic stem cells and may be involved in pluripotency networks [21]            |
| Platr30          | Pluripotency associated transcript 30                                                                                                                                 |
| Uph <sup>1</sup> | Hand2-associated long noncoding RNA, cotranscribed bidirectionally with cardiac transcription factor Hand2, which is an ancestral regulator of heart development [22] |

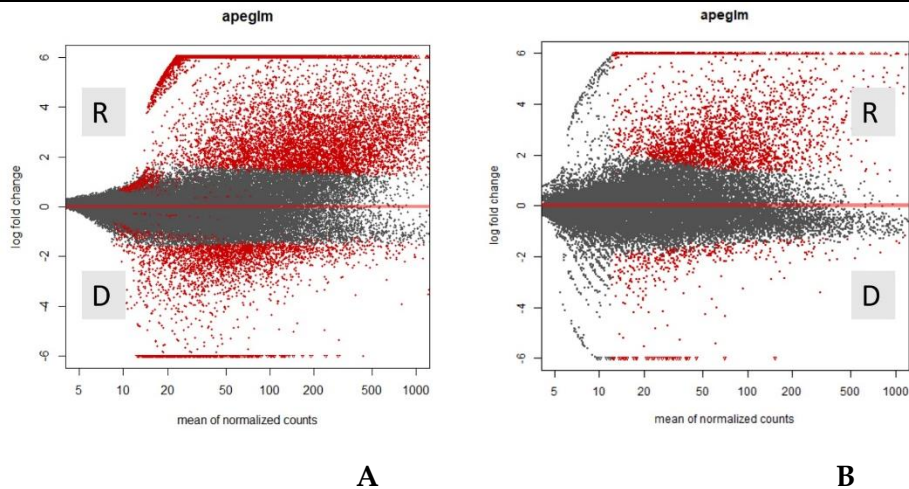

**Figure S1.** Analysis of next generation sequencing data reveals difference in amount of transcript expression in D and R fractions. MA plot showing log fold change (y-axis) in transcripts: **(A)** for protein-coding; **(B)** for lncRNA between sperm D molecules vs. R fractions compared with the mean of normalized counts (D and R n=4, each samples represents pooled sperm RNA, 2 technical replicates/group). MA plot to visualize RNA-seq data transformed onto the M (log fold change) and A (mean average) scale. Log fold change represents D versus R.

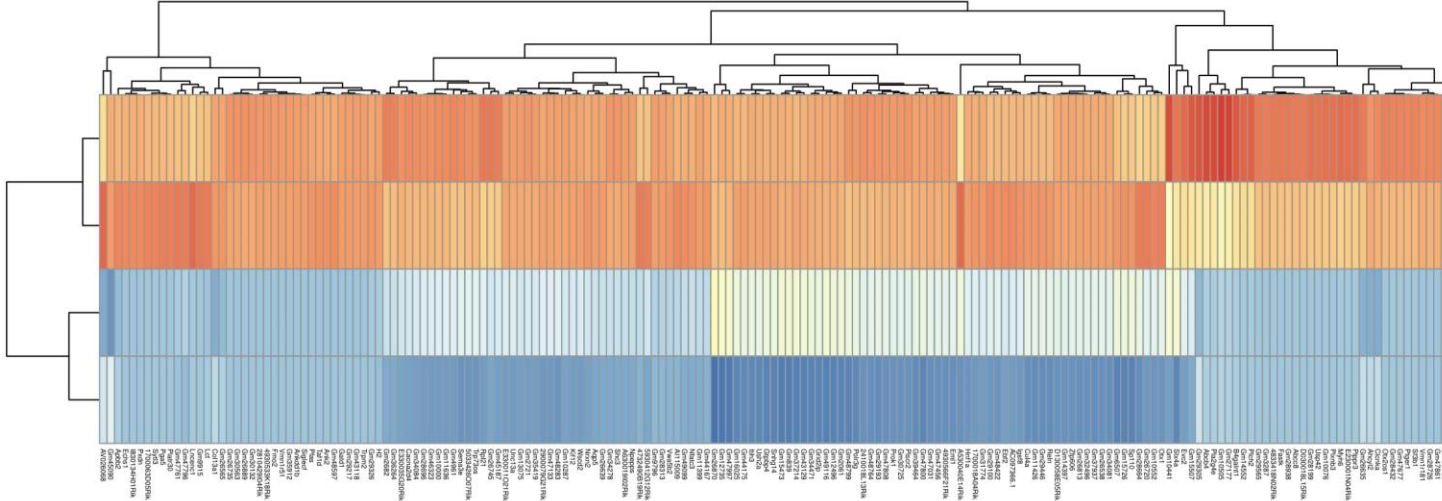

**Figure S2.** single lncRNA RNA transcripts in comparison with differential accumulation in sperm D fractions (n = 2 with two replicates). Plotted are the row z-score of log-normalized counts.

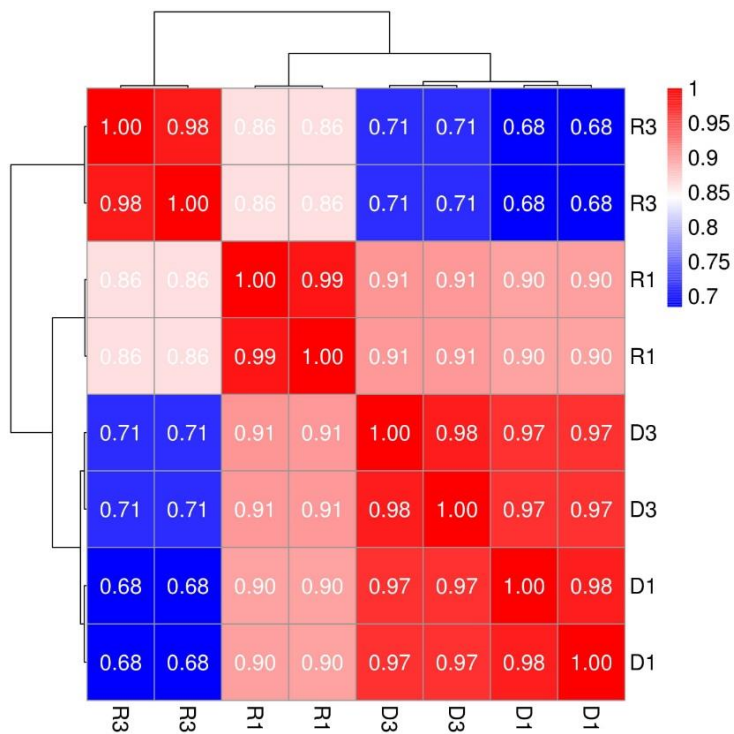

**Figure S3.** Hierarchical cluster analysis of the pairwise correlation coefficients between the D and R fractions of sperm transcripts.

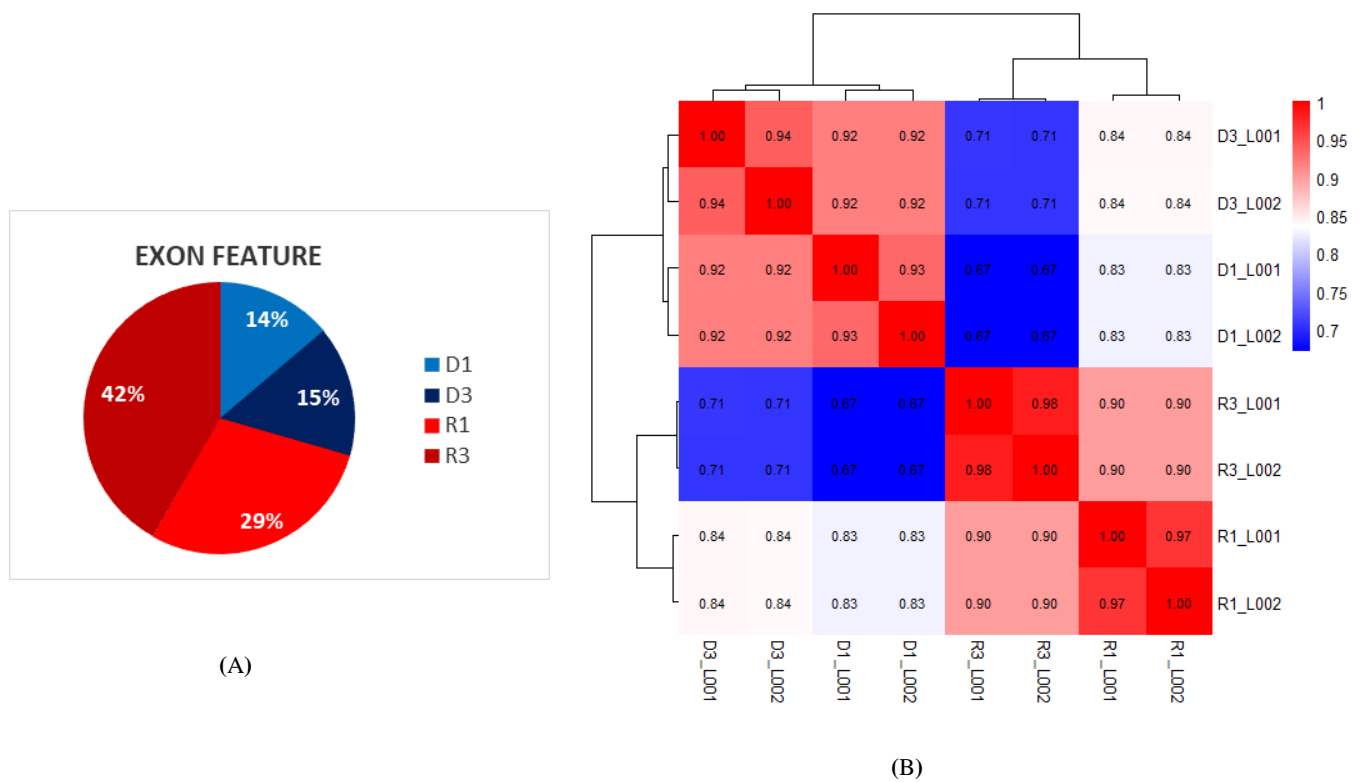

**Figure S4. (A)** Pie chart indicating the fraction of exon features (in percent) of D and R sperm fractions; **(B)** Hierarchical clustering showing the correlation between sperm exon features of D and R fractions.

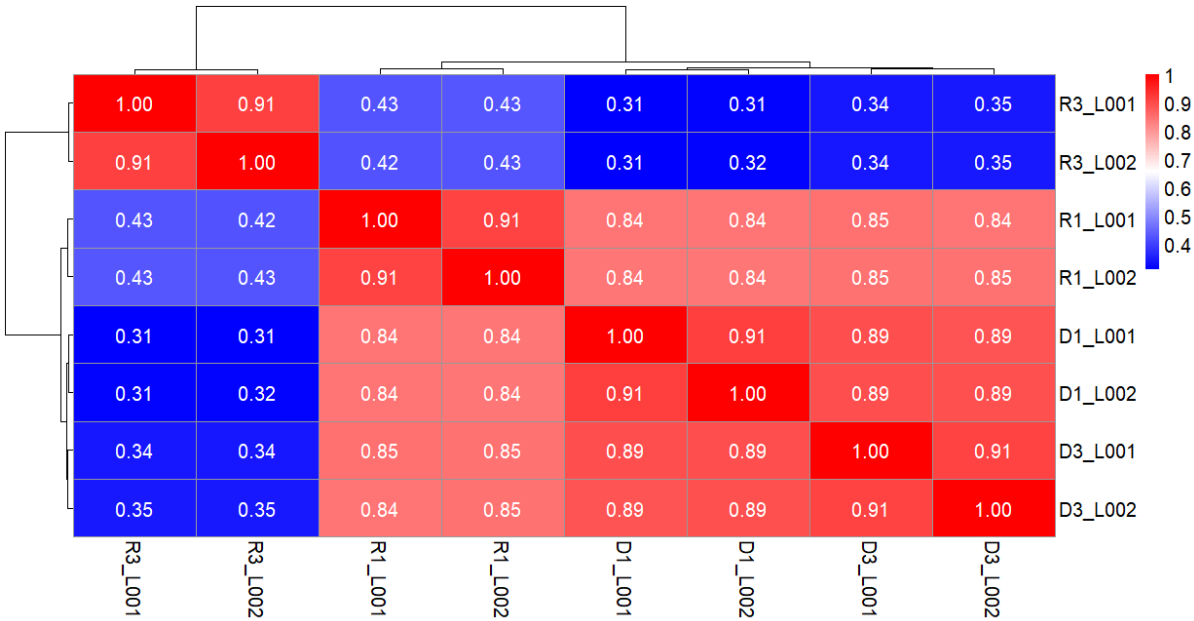

**Figure S5.** Hierarchical clustering of non-coding transcripts (piRNA and tRNA-derived fragments)

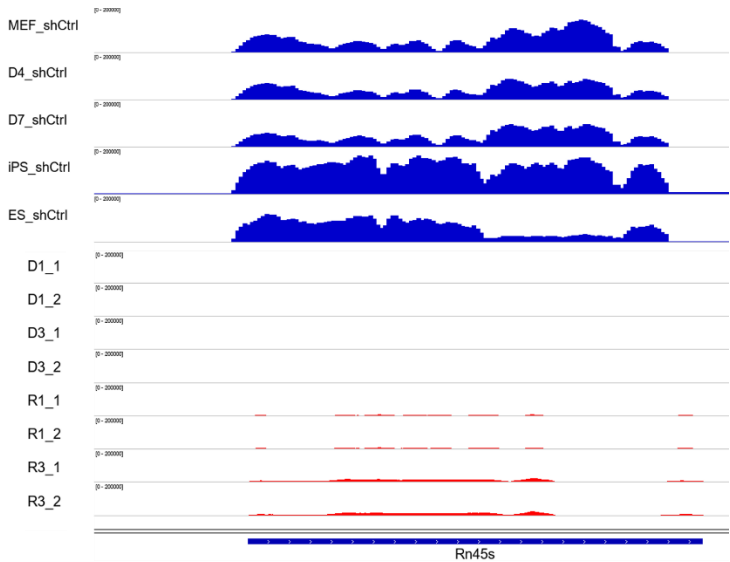

**Figure S6.** IGV visualization of wild-type somatic cells (MEF, D4, D7, iPS, ES) from Cossec et al., 2018 compared to sperm cells (D and R fractions).
